# Supplementary material for: Transmission Distortion Affecting Human Noncrossover but Not Crossover Recombination: A Hidden Source of Meiotic Drive
Source: PubMed Central journal article supplement (PMC3916235; doi:10.1371/journal.pgen.1004106), 2014-02-06
Supplement: pgen.1004106.s004.pdf [file pgen.1004106.s004.pdf]

**Table S1. Summary details of the six hotspots chosen for analysis**

| <b>Hotspot:</b>                                                                 | <b>E</b>                      | <b>F</b>                                                                                            | <b>H</b>                                                         | <b>K</b>                                                       | <b>T</b>                      | <b>5A</b>                                                            |
|---------------------------------------------------------------------------------|-------------------------------|-----------------------------------------------------------------------------------------------------|------------------------------------------------------------------|----------------------------------------------------------------|-------------------------------|----------------------------------------------------------------------|
| <b>centre location (GRCh37/hg19)</b>                                            | chr8:137,524,198              | chr12:5,749,255                                                                                     | chr3:14,817,625                                                  | chr8:94,302,762                                                | chr3:2,426,642                | chr5:1,935,700                                                       |
| <b>genomic context</b>                                                          | intergenic                    | intronic (ANO2)                                                                                     | Intergenic                                                       | intergenic                                                     | intronic (CNTN4)              | intergenic                                                           |
| <b>main activating <i>PRDM9</i> variant</b>                                     | A                             | A                                                                                                   | A                                                                | A                                                              | A                             | C                                                                    |
| <b>CO frequency per sperm (%)*</b>                                              | 0.49                          | 0.97                                                                                                | 0.13                                                             | 0.22                                                           | 1.10                          | 0.54                                                                 |
| <b>peak frequency (cM/Mb)</b>                                                   | 550                           | 1100                                                                                                | 180                                                              | 260                                                            | 1200                          | 600                                                                  |
| <b>95% width (kb)</b>                                                           | 1.4                           | 1.4                                                                                                 | 1.2                                                              | 1.4                                                            | 1.5                           | 1.5                                                                  |
| <b>Informative SNPs ±150 bp from centre (local name) [distance (bp) ; MAF†]</b> | rs2255417 (E6.8) [47 ; 0.372] | rs11063791 (F5.9) [87 ; 0.346]<br>rs386440 (F6.0) [-26 ; 0.277]<br>rs10492181 (F6.1) [-108 ; 0.133] | rs853334 (H7.5) [-29 ; 0.410]<br>rs3899614 (H7.6) [-102 ; 0.457] | rs1374633 (K7.4) [20 ; 0.302]<br>rs1374632 (K7.5) [-4 ; 0.406] | rs9854419 (T7.9) [10 ; 0.346] | rs13355978 (5A7.1) [127 ; 0.238]<br>rs116141470 (5A7.2) [21 ; 0.169] |

\* in men with two activating *PRDM9* alleles

† minor allele frequencies as determined from 94 north Europeans for hotspots E, F, H, K & T [refs 37,5], and from 74 Africans for hotspot 5A [ref 9].
