# Supplementary material for: Transmission Distortion Affecting Human Noncrossover but Not Crossover Recombination: A Hidden Source of Meiotic Drive
Source: PubMed Central journal article supplement (PMC3916235; doi:10.1371/journal.pgen.1004106), 2014-02-06
Supplement: pgen.1004106.s005.pdf [file pgen.1004106.s005.pdf]

**Table S2. Transmission data for initial screening of the six hotspots**

| Hotspot E |                    | E6.8A/G   |           |                |           |           |                 |           |           |                |           |           |                |            |           |                |          |           |                |
|-----------|--------------------|-----------|-----------|----------------|-----------|-----------|-----------------|-----------|-----------|----------------|-----------|-----------|----------------|------------|-----------|----------------|----------|-----------|----------------|
|           |                    | CO        |           |                | NCO       |           |                 |           |           |                |           |           |                |            |           |                |          |           |                |
| man       | molecules screened | A         | G         | % G            | A         | G         | % G             |           |           |                |           |           |                |            |           |                |          |           |                |
| 17        | 14720              | 20        | 16        | 44             | 9         | 12        | 57              |           |           |                |           |           |                |            |           |                |          |           |                |
| 56        | 22080              | 17        | 14        | 45             | 3         | 10        | 77              |           |           |                |           |           |                |            |           |                |          |           |                |
|           | <b>TOTAL</b>       | <b>37</b> | <b>30</b> | <b>45 (ns)</b> | <b>12</b> | <b>22</b> | <b>65 (ns)</b>  |           |           |                |           |           |                |            |           |                |          |           |                |
| Hotspot F |                    | F5.9T/C   |           |                |           |           |                 | F6.0T/A   |           |                |           |           |                | F6.1A/G    |           |                |          |           |                |
|           |                    | CO        |           |                | NCO       |           |                 | CO        |           |                | NCO       |           |                | CO         |           |                | NCO      |           |                |
| man       | molecules screened | T         | C         | % C            | T         | C         | % C             | A         | T         | % T            | A         | T         | % T            | A          | G         | % G            | A        | G         | % G            |
| 28        | 16660              | n/a       | n/a       | n/a            | n/a       | n/a       | n/a             | 81        | 67        | 45             | 8         | 6         | 43             | 83         | 65        | 44             | 0        | 11        | 100            |
| 11        | 16560              | 24        | 20        | 45             | 0         | 3         | 100             | 18        | 26        | 59             | 3         | 1         | 25             | 18         | 26        | 59             | 3        | 6         | 67             |
|           | <b>TOTAL</b>       | <b>24</b> | <b>20</b> | <b>45 (ns)</b> | <b>0</b>  | <b>3</b>  | <b>100 (ns)</b> | <b>99</b> | <b>93</b> | <b>48 (ns)</b> | <b>11</b> | <b>7</b>  | <b>61 (ns)</b> | <b>101</b> | <b>91</b> | <b>47 (ns)</b> | <b>3</b> | <b>17</b> | <b>85 (**)</b> |
| Hotspot H |                    | H7.5A/G   |           |                |           |           |                 | H7.6A/G   |           |                |           |           |                |            |           |                |          |           |                |
|           |                    | CO        |           |                | NCO       |           |                 | CO        |           |                | NCO       |           |                |            |           |                |          |           |                |
| man       | molecules screened | A         | G         | % G            | A         | G         | % G             | A         | G         | % G            | A         | G         | % G            |            |           |                |          |           |                |
| 25        | 24840              | 13        | 18        | 58             | 3         | 7         | 70              | 9         | 22        | 71             | 4         | 6         | 60             |            |           |                |          |           |                |
| 52        | 22080              | 28        | 21        | 43             | 3         | 5         | 63              | 23        | 26        | 53             | 2         | 4         | 67             |            |           |                |          |           |                |
|           | <b>TOTAL</b>       | <b>41</b> | <b>39</b> | <b>49(ns)</b>  | <b>6</b>  | <b>12</b> | <b>67 (ns)</b>  | <b>34</b> | <b>41</b> | <b>60 (ns)</b> | <b>6</b>  | <b>10</b> | <b>63 (ns)</b> |            |           |                |          |           |                |

| Hotspot K  |                    | K7.4T/C  |     |         |     |     |         | K7.5C/G  |     |          |     |     |          |
|------------|--------------------|----------|-----|---------|-----|-----|---------|----------|-----|----------|-----|-----|----------|
|            |                    | CO       |     |         | NCO |     |         | CO       |     |          | NCO |     |          |
| man        | molecules screened | T        | C   | % C     | T   | C   | % C     | C        | G   | % G      | C   | G   | % G      |
| 28         | 13800              | 14       | 6   | 30      | 8   | 12  | 60      | 12       | 8   | 40       | 7   | 10  | 59       |
| 90         | 29440              | 26       | 35  | 57      | 12  | 28  | 70      | 31       | 27  | 47       | 28  | 12  | 30       |
|            | TOTAL              | 40       | 41  | 51 (ns) | 20  | 40  | 67 (*)  | 43       | 35  | 45 (ns)  | 35  | 22  | 39 (ns)  |
| Hotspot T  |                    | T7.9A/G  |     |         |     |     |         |          |     |          |     |     |          |
|            |                    | CO       |     |         | NCO |     |         |          |     |          |     |     |          |
| man        | molecules screened | A        | G   | % G     | A   | G   | % G     |          |     |          |     |     |          |
| 25         | 6992               | 11       | 20  | 65      | 5   | 10  | 67      |          |     |          |     |     |          |
| 60         | 9200               | 0        | 2   | 100     | 0   | 1   | 100     |          |     |          |     |     |          |
|            | TOTAL              | 11       | 22  | 67 (ns) | 5   | 11  | 69 (ns) |          |     |          |     |     |          |
| Hotspot 5A |                    | 5A7.1T/C |     |         |     |     |         | 5A7.2A/G |     |          |     |     |          |
|            |                    | CO       |     |         | NCO |     |         | CO       |     |          | NCO |     |          |
| man        | molecules screened | T        | C   | % C     | T   | C   | % C     | A        | G   | % G      | A   | G   | % G      |
| 243        | 16560              | 20       | 30  | 60      | 2   | 2   | 50      | n/a      | n/a | n/a      | n/a | n/a | n/a      |
| 253        | 15180              | n/a      | n/a | n/a     | n/a | n/a | n/a     | 39       | 78  | 67       | 6   | 28  | 82       |
|            | TOTAL              | 20       | 30  | 60 (ns) | 2   | 2   | 50 (ns) | 39       | 78  | 67 (***) | 6   | 28  | 82 (***) |

Deviation from expected 50:50 ratio of alleles determined by 2-tailed exact binomial test; (ns) = P>0.05, (\*) = P<0.05, (\*\*) = P <0.005, (\*\*\*) = P<0.0005

n/a, not applicable
