# Supplementary material for: Transmission Distortion Affecting Human Noncrossover but Not Crossover Recombination: A Hidden Source of Meiotic Drive
Source: PubMed Central journal article supplement (PMC3916235; doi:10.1371/journal.pgen.1004106), 2014-02-06
Supplement: pgen.1004106.s006.pdf [file pgen.1004106.s006.pdf]

**Table S3. *PRDM9* genotypes of men analysed at hotspots F and K, plus selector primers for allele-specific PCR and phasing of heterozygous markers**

**Hotspot F**

| man | <i>PRDM9</i> genotype | 1° selector primers | 2° selector primers | Phasing of heterozygous markers*                                                                 |
|-----|-----------------------|---------------------|---------------------|--------------------------------------------------------------------------------------------------|
| 2   | A A                   | F4.6FT / FC         | F4.8FC / FT         | F4.6T-F4.8C-F4.9G-F5.0T-F5.0aA-F5.1T-F5.4C-F5.5A-F6.1G-F6.6G-F6.8C-F7.5C-F7.6G-F8.9T-F9.2G-F9.4A |
| 11  | A A                   | F3.8aFG2 / FA2      | F3.9FC / FT         | F3.8aG-F3.9T-F5.0T-F5.6aC-F5.9T-F6.0T-F6.1G-F6.6bG-F7.5C                                         |
| 20  | A A                   | F4.6FT / FC         | F4.8FC / FT         | F4.6C-F4.8T-F4.9A-F5.0G-F5.0aG-F5.1C-F5.4T-F5.5T-F6.1G-F6.6A-F6.6bG                              |
| 28  | A A                   | F13.3RC / RT        | F13.0RT2 / RG2      | F5.4T-F5.5T-F6.0T-F6.1G-F6.6G-F7.5T-F9.2A-F10.6A-F11.3C-F12.0C-F13.0T-F13.3C                     |
| 31  | A A                   | F4.6FT / FC         | F4.8FC / FT         | F4.6C-F4.8T-F4.9A-F5.0G-F5.0aG-F5.1C-F6.0A-F6.1G-F7.6C-F9.4G                                     |
| 35  | A A                   | F4.6FT / FC         | F4.8FC / FT         | F4.6C-F4.8T-F4.9A-F5.0G-F5.0aG-F5.1C-F5.4T-F5.5T-F5.9C-F6.1G-F7.6C-F9.4G                         |
| 51  | A A                   | F4.6FT / FC         | F4.8FC / FT         | F4.6T-F4.8C-F4.9G-F5.0T-F5.0aA-F5.6aC-F6.1G-F6.5T-F7.5T-F8.1C                                    |
| 55  | A A                   | F4.6FT / FC         | F4.8FC / FT         | F4.6C-F4.8T-F5.0aG-F5.1C-F5.4T-F5.8G-F6.1G-F6.5C-F6.6bA-F7.6G-F9.4A                              |
| 77  | A B                   | F4.6FT / FC         | F4.8FC / FT         | F4.6C-F4.8T-F5.0aG-F5.1C-F5.4T-F5.5T-F6.1G-F6.6G-F7.5T-F9.2A                                     |
| 87  | A E                   | F4.6FT / FC         | F4.8FC / FT         | F4.6C-F4.8T-F5.0aG-F5.1C-F5.4T-F5.5T-F6.1G-F7.1G                                                 |

**Hotspot K**

| man | <i>PRDM9</i> genotype | 1° selector primers | 2° selector primers | Phasing of heterozygous markers*                                        |
|-----|-----------------------|---------------------|---------------------|-------------------------------------------------------------------------|
| 12  | A B                   | K11.7RC / RT        | K10.9RA / RG        | K4.9T-K7.4C-K7.5C-K7.8aT-K7.9T-K10.2G-K10.9G-K11.7T                     |
| 21  | A A                   | K11.7RC / RT        | K10.9RA / RG        | K4.9T-K6.2C-K7.5C-K9.9G-K10.2G-K10.9G-K11.7T                            |
| 28  | A A                   | K11.7RC / RT        | K10.9RA / RG        | K4.9C-K5.1G-K6.2T-K6.4T-K7.4C-K7.5G-K7.8aC-K7.9C-K10.2A-K10.9A-K11.7C   |
| 35  | A A                   | K2.9FC / FT2        | K3.2FC2 / FG2       | K2.9T-K3.2G-K4.9T-K6.2C-K7.4C-K7.5C-K9.9G                               |
| 39  | A A                   | K2.9FC / FT2        | K3.2FC2 / FG2       | K2.9T-K3.2G-K5.1A-K6.2C-K6.4C-K7.4C-K7.5C-K9.9A                         |
| 43  | A L20                 | K2.9FC / FT2        | K3.2FC2 / FG2       | K2.9C-K3.2C-K4.9C-K5.1G-K6.2T-K6.4T-K7.4C-K7.5C-K10.2A-K10.9A-K11.7C    |
| 64  | A A                   | K11.7RC / RT        | K10.9RA / RG        | K5.1G-K7.5G-K7.9T-K8.8C-K10.2G-K10.9G-K11.7T                            |
| 67  | A A                   | K2.9FC / FT2        | K3.2FC2 / FG2       | K2.9T-K3.2G-K4.9T-K5.1A-K6.2C-K6.4C-K7.5G-K7.8aC-K7.9C                  |
| 71  | A A                   | K11.7RC / RT        | K10.9RA / RG        | K4.9T-K7.4C-K7.5C-K7.8aT-K7.9T-K10.2G-K10.9G-K11.7T                     |
| 90  | A A                   | K11.7RC / RT        | K10.9RA / RG        | K4.9T-K5.1A-K6.2C-K6.4C-K7.4C-K7.5C-K7.8aT-K7.9T-K10.2G-K10.2G-K11.7T   |
| 172 | A A                   | K2.9FC / FT2        | K3.2FC2 / FG2       | K2.9T-K3.2G-K4.9T-K6.2C-K6.4C-K7.4C-K7.5G-K7.5aA-K7.8aC-K8.8T           |
| 247 | A A                   | K2.9FC / FT2        | K3.2FC2 / FG2       | K2.9C-K3.2C-K6.2T-K6.4T-K7.5C-K7.6T-K7.8aT-K8.8T-K10.2G-K10.9G-K11.7T   |
| 278 | A A                   | K11.7RC / RT        | K10.9RA / RG        | K6.2T-K6.4T-K6.6C-K7.3G-K7.5G-K7.5aT-K7.6T-K7.7(-)-K10.2G-K10.9G-K11.7T |

\* For hotspot F haplotypes bearing F6.1G are shown. For K7.4 heterozygotes, haplotypes with K7.4C are shown.
