# Supplementary material for: Transmission Distortion Affecting Human Noncrossover but Not Crossover Recombination: A Hidden Source of Meiotic Drive
Source: PubMed Central journal article supplement (PMC3916235; doi:10.1371/journal.pgen.1004106), 2014-02-06
Supplement: pgen.1004106.s007.pdf [file pgen.1004106.s007.pdf]

**Table S4. Comparison of existing limited CO data-sets for hotspots F and K with the expanded data-sets generated in this study**

| <b>Hotspot F</b>            | <b>Previous analyses</b> | <b>Present study</b> |
|-----------------------------|--------------------------|----------------------|
| number of men analysed      | 3                        | 10                   |
| mean crossover frequency, % | 0.97                     | 0.81                 |
| CO frequency range, %       | 0.82-1.09                | 0.21-1.30            |
| mean centre location*       | chr12:5,749,255          | chr12:5,749,271      |
| mean 95% width (kb)         | 1.40                     | 1.60                 |
| <b>Hotspot K</b>            | <b>Previous analyses</b> | <b>Present study</b> |
| number of men analysed      | 3                        | 13                   |
| mean crossover frequency, % | 0.22                     | 0.26                 |
| CO frequency range, %       | 0.19-0.26                | 0.04-0.44            |
| mean centre location*       | chr8:94,302,762          | chr8:94,302,727      |
| mean 95% width (kb)         | 1.40                     | 1.46                 |

\* Given with respect to February 2009 assembly (GRCh37/hg19)
