# Supplementary material for: Transmission Distortion Affecting Human Noncrossover but Not Crossover Recombination: A Hidden Source of Meiotic Drive
Source: PubMed Central journal article supplement (PMC3916235; doi:10.1371/journal.pgen.1004106), 2014-02-06
Supplement: pgen.1004106.s008.pdf [file pgen.1004106.s008.pdf]

**Table S5. PCR conditions for recombination assays at hotspots E, F, H, K, T and 5A**

**Hotspot E**

| primer                                                 | sequence 5'-3'                                                            | PCR conditions                                                                                       |
|--------------------------------------------------------|---------------------------------------------------------------------------|------------------------------------------------------------------------------------------------------|
| <b>1° PCR:</b><br>E12.4R+2 or<br>E12.4R-<br>with E4.9F | ATTGACCCAGTTTACTACACATAGT<br>ACCCAGTTTACTACACAGT<br>GAGTATGAATGGTGCTCTCCC | 25 cycles: 96°C 20 sec, 58°C, 30 sec, 65°C 9 min<br>25 cycles: 96°C 20 sec, 58°C, 30 sec, 65°C 9 min |
| <b>2° PCR:</b><br>E10.6RT or<br>E10.6RC<br>with E5.6F  | CAGCCTGGTCAACCTGA<br>AGCCTGGTCAACCTGG<br>TAACCATGCACTGAGCTCCC             | 38 cycles: 96°C 20 sec, 62°C, 30 sec, 65°C 6 min<br>38 cycles: 96°C 20 sec, 62°C, 30 sec, 65°C 6 min |

**Hotspot F**

| primer                                                | sequence 5'-3'                                                     | PCR conditions                                                                                                                                        |
|-------------------------------------------------------|--------------------------------------------------------------------|-------------------------------------------------------------------------------------------------------------------------------------------------------|
| <b>1° PCR:</b><br>F4.6FT or<br>F4.6FC<br>with F9.7R   | AGGGGATCTGGCTGCCT<br>AGGGGATCTGGCTGCCC<br>ATCCAAATGGCCAATGAGCC     | 26 cycles: 96°C 20 sec, 63°C 30 sec, 65°C 7 min<br>26 cycles: 96°C 20 sec, 63°C 30 sec, 65°C 7 min                                                    |
| <b>2° PCR:</b><br>F4.8FC or                           | GTCCAGAGTCTTACTTGAC                                                | 6 cycles: 96°C 20 sec, 65°C 30 sec, 65°C 6 min; 6<br>cycles: 96°C 20 sec, 64°C 30 sec, 65°C 6 min; 21<br>cycles: 96°C 20 sec, 63°C 30 sec, 65°C 6 min |
| F4.8FT                                                | GTCCAGAGTCTTACTTGAT                                                | 6 cycles: 96°C 20 sec, 63°C 30 sec, 65°C 6 min; 6<br>cycles: 96°C 20 sec, 62°C 30 sec, 65°C 6 min; 21<br>cycles: 96°C 20 sec, 61°C 30 sec, 65°C 6 min |
| with 9.5R                                             | AGTACATATATCTGGGGCC                                                |                                                                                                                                                       |
| <b>1° PCR:</b><br>F3.8aFG or<br>F3.8aFA<br>with F9.7R | GAGYACCAACCCAGTCACG<br>GAGYACCAACCCAGTCACA<br>ATCCAAATGGCCAATGAGCC | 25 cycles: 96°C 20 sec, 64°C 30 sec, 65°C 9 min<br>25 cycles: 96°C 20 sec, 62°C 30 sec, 65°C 9 min                                                    |
| <b>2° PCR:</b><br>F3.8FT or<br>F3.8FC                 | ccccCAATGCTACTCTTCTGGAT<br>ccccCAATGCTACTCTTCTGGAC                 | 35 cycles: 96°C 20 sec, 60°C 30 sec, 65°C 7 min<br>10 cycles: 96°C 20 sec, 65°C 30 sec, 67°C 7 min 25<br>cycles: 96°C 20 sec, 64°C 30 sec, 65°C 7 min |
| with 9.5R                                             | AGTACATATATCTGGGGCC                                                |                                                                                                                                                       |
| <b>1° PCR:</b><br>F13.3RC or<br>F13.3RT<br>with F3.5F | CGTTTGTGGATAGACCAGG<br>CGTTTGTGGATAGACCAGA<br>CAACTCCAGACCTACTGACC | 25 cycles: 96°C 20 sec, 63°C 30 sec, 65°C 11 min<br>25 cycles: 96°C 20 sec, 63°C 30 sec, 65°C 11 min                                                  |
| <b>2° PCR:</b><br>F13.0RG or<br>F13.0RT<br>with F4.0F | GCCAGCATGGGCAAGACC<br>TGCCAGCATGGGCAAGACA<br>ATTGATCCAAGGTCTGGAGG  | 35 cycles: 96°C 20 sec, 63°C 30 sec, 65°C 10 min<br>35 cycles: 96°C 20 sec, 63°C 30 sec, 65°C 10 min                                                  |

**Hotspot H**

| primer                                               | sequence 5'-3'                                                   | PCR conditions                                                                                         |
|------------------------------------------------------|------------------------------------------------------------------|--------------------------------------------------------------------------------------------------------|
| <b>1° PCR:</b><br>H2.0FA or<br>H2.0FG<br>with H12.3R | TCCCAGAGCTACCTCAAA<br>TCCCAGAGCTACCTCAAG<br>ATACACGGCAGGCTTTGCCC | 25 cycles: 96°C 20 sec, 61°C, 30 sec, 65°C 11 min<br>25 cycles: 96°C 20 sec, 62°C, 30 sec, 65°C 11 min |
| <b>2° PCR:</b><br>H2.5FA or<br>H2.5FG<br>with H10.3R | GCTCCAGAAGGACCCTCA<br>CTCCAGAAGGACCCTCG<br>ATCTTACTCTTACCCCTAC   | 35 cycles: 96°C 20 sec, 64°C, 30 sec, 65°C 9 min<br>35 cycles: 96°C 20 sec, 61°C, 30 sec, 65°C 9 min   |

**Hotspot K**

| primer                                                | sequence 5'-3'                                                             | PCR conditions                                                                                       |
|-------------------------------------------------------|----------------------------------------------------------------------------|------------------------------------------------------------------------------------------------------|
| <b>1° PCR:</b><br>K11.7RC or<br>K11.7RT<br>with K4.4F | TGAAGGTAGAATTGGCCG<br>GTGAAGGTAGAATTGGCCA<br>CACATGTCAGCACACATTGCCC        | 25 cycles: 95°C 20 sec, 59.5°C 30 sec, 65°C 9 min<br>25 cycles: 95°C 20 sec, 60°C 30 sec, 65°C 9 min |
| <b>2° PCR:</b><br>K10.9RA or<br>K10.9RG<br>with K4.5F | CCCCCCCCCTTAATTTTTAAACT<br>CCCCCCCCCTTAATTTTTAAACC<br>GCGAGGAGTCTTAAACTCCC | 38 cycles: 95°C 20 sec, 60°C 30 sec, 65°C 8 min<br>38 cycles: 95°C 20 sec, 60°C 30 sec, 65°C 8 min   |
| <b>1° PCR:</b><br>K2.9FC<br>K2.9FT2<br>with K10.8R    | CCAGGTCCCCTGTCTC<br>GTTCAGGTCCCCTGTCTT<br>CTTGCTGAAGCCTCTCCC               | 28 cycles: 95°C 20 sec, 62°C 30 sec, 65°C 9 min<br>25 cycles: 95°C 20 sec, 63°C 30 sec, 65°C 9 min   |

|                |                         |                                                                                                                                                                                                      |
|----------------|-------------------------|------------------------------------------------------------------------------------------------------------------------------------------------------------------------------------------------------|
| <b>2° PCR:</b> |                         |                                                                                                                                                                                                      |
| K3.2FC2 or     | ccccGAAAAACAGCACATCAGAC | 10 cycles: 95°C 20 sec, 61°C 30 sec, 65°C 9 min; 25 cycles: 95°C 20 sec, 60°C 30 sec, 65°C 9 min<br>10 cycles: 95°C 20 sec, 61°C 30 sec, 65°C 9 min; 25 cycles: 95°C 20 sec, 60°C 30 sec, 65°C 9 min |
| K3.2FG2        | ccccGAAAAACAGCACATCAGAG |                                                                                                                                                                                                      |
| with K10.8R    | CTTGGCTGAAGCCTCTCCC     |                                                                                                                                                                                                      |

**Hotspot T**

|                |                         |                                                    |
|----------------|-------------------------|----------------------------------------------------|
| <b>primer</b>  | <b>sequence 5'-3'</b>   | <b>PCR conditions</b>                              |
| <b>1° PCR:</b> |                         |                                                    |
| T10.8RC or     | ccccCTTTGTTTTCTGTCTTCTG | 25 cycles: 96°C 20 sec, 62°C, 30 sec, 65°C 11 min  |
| T10.8RT        | ccccCTTTGTTTTCTGTCTTCTA | 25 cycles: 96°C 20 sec, 58°C, 30 sec, 65°C 11 min  |
| with T1.1F     | GGCCCAACATACATTGGCTC    |                                                    |
| <b>2° PCR:</b> |                         |                                                    |
| T9.6+ or       | ccccGCAATTTTCATGTATCTC  | 35 cycles: 96°C 20 sec, 58°C, 30 sec, 65°C 9.5 min |
| T9.6-          | ccccTGCAATTTTCATGTACTC  | 35 cycles: 96°C 20 sec, 58°C, 30 sec, 65°C 9.5 min |
| with T1.3F     | GAGGACAGTCCTGGCTGTG     |                                                    |

**Hotspot 5A**

|                |                       |                                                    |
|----------------|-----------------------|----------------------------------------------------|
| <b>primer</b>  | <b>sequence 5'-3'</b> | <b>PCR conditions</b>                              |
| <b>1° PCR:</b> |                       |                                                    |
| 5A9.9aRG or    | CTTGTGATCTCACAGCAC    | 25 cycles: 96°C 20 sec, 55°C, 30 sec, 65°C 7.5 min |
| 5A9.9aRC       | CTTGTGATCTCACAGCAG    | 25 cycles: 96°C 20 sec, 55°C, 30 sec, 65°C 7.5 min |
| with 5A3.6F    | AGCTGACATGGCCAAGTTCC  |                                                    |
| <b>2° PCR:</b> |                       |                                                    |
| 5A9.9RC or     | TCTCACAGCACAGGTTGG    | 32 cycles: 96°C 20 sec, 58°C, 30 sec, 65°C 7.5 min |
| 5A9.9RG        | TCTCACAGCAGAGGTTGC    | 32 cycles: 96°C 20 sec, 55°C, 30 sec, 65°C 7.5 min |
| with 5A3.7F    | CCTGGCGAATAGCTCTTTCC  |                                                    |
