# Supplementary material for: Transmission Distortion Affecting Human Noncrossover but Not Crossover Recombination: A Hidden Source of Meiotic Drive
Source: PubMed Central journal article supplement (PMC3916235; doi:10.1371/journal.pgen.1004106), 2014-02-06
Supplement: pgen.1004106.s009.pdf [file pgen.1004106.s009.pdf]

**Table S6. Oligonucleotides used for recombinant detection by allele-specific hybridisation at hotspots F and K**

**Hotspot F**

| rs number   | chr12(hg19) | Allele-Specific Oligonucleotides |            |                     |
|-------------|-------------|----------------------------------|------------|---------------------|
|             |             | allele                           | probe name | sequence 5'-3'      |
| rs11063787  | 5748205     | G                                | F4.9G      | AGCTTC TGGTATGCTCTT |
| "           | "           | A                                | F4.9A      | AGCTTC TAGTATGCTCTT |
| rs11063788  | 5748248     | T                                | F5.0T      | GAGAAA ACTCCACAGAAA |
| "           | "           | G                                | F5.0G      | GAGAAA ACGCCACAGAAA |
| rs11063789  | 5748324     | A                                | F5.0aA     | CTTCCAGAAAAGGGAAG   |
| "           | "           | G                                | F5.0aG     | CTTCCAGAAAAGGGAAG   |
| rs1558780   | 5748391     | C                                | F5.1C      | CATGGC ACAYGATAGTAG |
| "           | "           | T                                | F5.1T      | CATGGC ATAYGATAGTAG |
| rs10849308  | 5748656     | T                                | F5.4T2     | CGTGCT GAAGGTACTACT |
| "           | "           | C                                | F5.4C2     | CGTGCT GGAGGTACTACT |
| rs365211    | 5748844     | T                                | F5.5T2     | CCACTCC ACTGTCCCC   |
| "           | "           | A                                | F5.5A2     | CCACTCC CTCTGTCCCC  |
| rs365131    | 5748918     | C                                | F5.6aC     | CCTCAGG CAGTGGGAAGC |
| "           | "           | A                                | F5.6aA     | CCTCAGG AGATGGGAAGC |
| rs393861    | 5749047     | G                                | F5.8G      | GATGAG AGTCCAGGCTGT |
| "           | "           | A                                | F5.8A      | GATGAGA ATCCAGGCTGT |
| rs11063791  | 5749168     | T                                | F5.9T      | TCGCCT CAGCAATTCCC  |
| "           | "           | C                                | F5.9C      | TCGCCT CCGCAATTCCC  |
| rs386440    | 5749281     | A                                | F6.0A2     | CTTGTG TTAGAAACCAGC |
| "           | "           | T                                | F6.0T2     | CTTGTG TAAGAAACCAGC |
| rs10492181  | 5749363     | A                                | F6.1A2     | TGCCAAT CTACCGAGTCA |
| "           | "           | G                                | F6.1G2     | TGCCAAT CCACCGAGTCA |
| rs9795821   | 5749807     | T                                | F6.5T      | TCACTGG TCATCAGAGAA |
| "           | "           | C                                | F6.5C      | TCACTGG CCATCAGAGAA |
| rs384401    | 5749841     | G                                | F6.6G2     | GGGATGG TACCTCATTGT |
| "           | "           | A                                | F6.6A2     | GGGATGG TATCTCATTGT |
| rs11063792  | 5749932     | A                                | F6.6bA     | CTTTTAC ACTGTTGGTGG |
| "           | "           | G                                | F6.6bG     | CTTTTAC GCTGTTGGTGG |
| rs111733683 | 5750109     | T                                | F6.8T      | GCAGCA CTATTACAACA  |
| "           | "           | C                                | F6.8C      | GCAGCA CCATTACAACA  |
| rs374793    | 5750357     | A                                | F7.1A      | TGGACAC AGGGCGAGGAA |
| "           | "           | G                                | F7.1G      | TGGACAC GGGGCGAGGAA |
| rs417672    | 5750791     | T                                | F7.5T2     | GAATGGG GAGAGCCCC   |
| "           | "           | C                                | F7.5C2     | GAATGGG GGGAGCCCC   |
| rs1558506   | 5750896     | G                                | F7.6G      | TCAATTAG TTATTGGTTC |
| "           | "           | C                                | F7.6C      | TCAATTAC TTATTGGTTC |
| rs2110166   | 5751342     | C                                | F8.1C      | CAATTCT CTTTTCTGTCT |
| "           | "           | T                                | F8.1T      | CAATTCT TTTTTCTGTCT |
| rs12811402  | 5752212     | T                                | F8.9T      | GTGAACA TGCAGAAAAAT |
| "           | "           | C                                | F8.9C      | GTGAACA CAGAAAAAT   |

## Hotspot K

| rs number  | chr8(hg19) | Allele-Specific Oligonucleotides |            |                     |
|------------|------------|----------------------------------|------------|---------------------|
|            |            | allele                           | probe name | sequence 5'-3'      |
| rs6999442  | 94300209   | T                                | K4.9T      | GTTCAATACATTACTCTG  |
| "          | "          | C                                | K4.9C      | GTTCAATGCATTACTCTG  |
| rs35234504 | 94300343   | G                                | K5.1G      | TCTGGCTCATGGGTCACC  |
| "          | "          | A                                | K5.1A      | TCTGGCTTATGGGTCACC  |
| rs2034306  | 94301420   | T                                | K6.2T      | AAGACATTTTGGACTTCT  |
| "          | "          | C                                | K6.2C      | AAGACATCTTGGACTTCT  |
| rs7005566  | 94301642   | T                                | K6.4T      | GTGCCAGACACGTGGTAA  |
| "          | "          | C                                | K6.4C      | GTGCCAGGCACGTGGTAA  |
| rs56791026 | 94301906   | C                                | K6.6C      | CTAAAAGCCTTACCAGAT  |
| "          | "          | T                                | K6.6T      | CTAAAAGTCTTACCAGAT  |
| rs1374634  | 94302598   | G                                | K7.3G      | ACCAGGCGGGACACCGAC  |
| "          | "          | A                                | K7.3A      | ACCAGGCAGGACACCGAC  |
| rs1374633  | 94302742   | C                                | K7.4C      | GAGAGGGCACCCCTGCCTA |
| "          | "          | T                                | K7.4T      | GAGAGGGTACCCTGCCTA  |
| rs1374632  | 94302766   | G                                | K7.5G      | TGTGATGCCCTCCCTGAT  |
| "          | "          | C                                | K7.5C      | TGTGATGGCCTCCCTGAT  |
| rs7814351  | 94302818   | T                                | K7.5aT     | TCATGGTTTTTCACCTAAA |
| "          | "          | A                                | K7.5aA     | TCATGGTATTCACCTAAA  |
| rs6471366  | 94302844   | T                                | K7.6T      | TAACCTTGC AATAGTCC  |
| "          | "          | C                                | K7.6C      | TAACCTTCGCAATAGTCC  |
| rs10716160 | 94302948   | +                                | K7.7 +     | AACCTCTAGCCTCCTGGG  |
| "          | "          | -                                | K7.7 -     | AACCTCTGCCTCCTGGGT  |
| rs10088843 | 94303110   | C                                | K7.8aC     | ATTCACCCGCCTTGGCCT  |
| "          | "          | T                                | K7.8aT     | ATTCACCTGCCTTGGCCT  |
| rs6471367  | 94303153   | T                                | K7.9T      | GAGCCACTGTRCCCGGCC  |
| "          | "          | C                                | K7.9C      | GAGCCACCGTRCCCGGCC  |
| rs9918898  | 94304095   | T                                | K8.8T      | CCAACCTTTGTGAGCCTC  |
| "          | "          | C                                | K8.8C      | CCAACCTTCTGTGAGCCTC |
| rs1550883  | 94305178   | A                                | K9.9A      | TTCATGCGTCTCAGTCAC  |
| "          | "          | G                                | K9.9G      | TTCATGCATCTCAGTCAC  |
| rs1550882  | 94305482   | A                                | K10.2A     | TGGGTCAATTTACAGAT   |
| "          | "          | G                                | K10.2G     | TGGGTCAAGTTTACAGAT  |
| rs7829351  | 94306209   | A                                | K10.9A     | GTGTGTCAGTTTTAAAAAT |
| "          | "          | G                                | K10.9G     | GTGTGTCGGTTTTAAAAAT |
